# Supplementary material
Source: Springer Nature journal article supplement (https://www.springermedizin.de/resource/supplementary/12913_2012_2371_MOESM3_ESM.pdf/9530514)

**Scale 1-7 (1= very easy, 7= very difficult)**

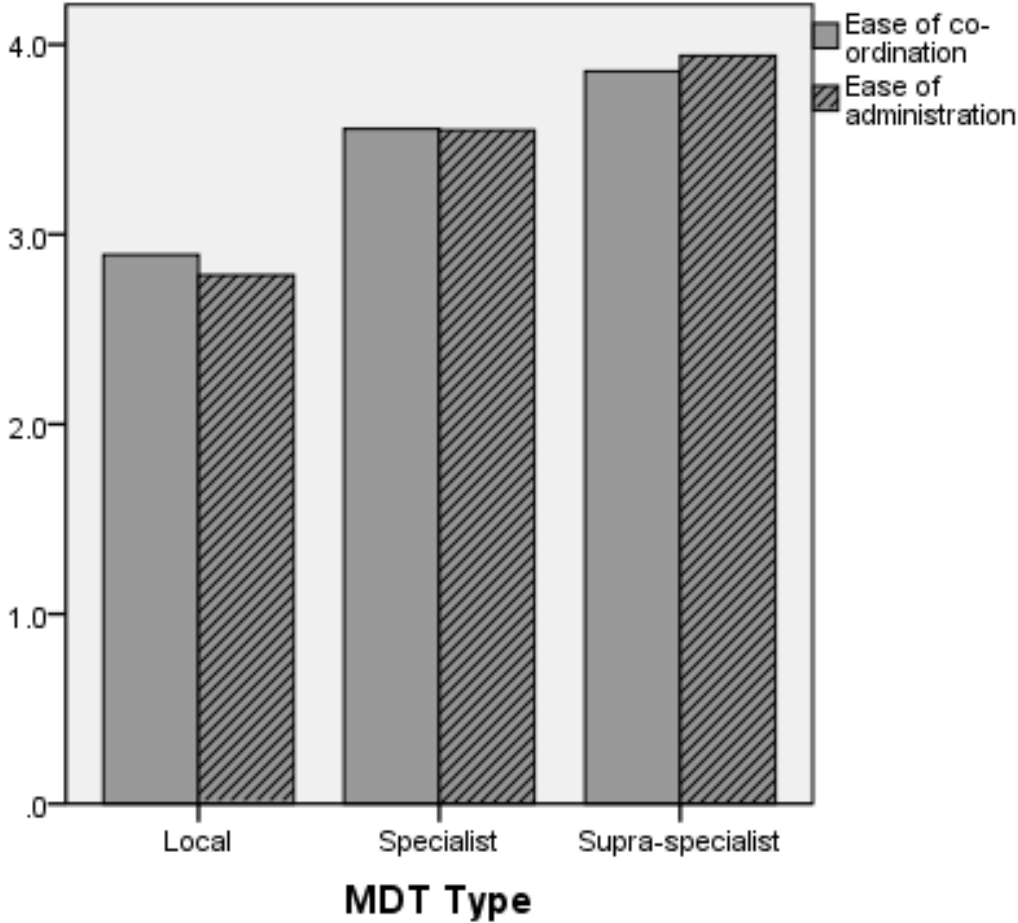

Supplement: MOESM3 [file 9530514]
